# Supplementary material
Source: PubMed Central journal article supplement (PMC8972076)
Supplement: NIHMS1749816-supplement-supinfo.pdf [file NIHMS1749816-supplement-supinfo.pdf]

1  
2  
3  
4  
5  
6  
7  
8  
9  
10  
11  
12  
13

## Effective methods for isolation and purification of extracellular vesicles from plants

Yifan Huang<sup>1,2</sup>, Shumei Wang<sup>3</sup>, Qiang Cai<sup>1,2\*</sup> and Hailing Jin<sup>3\*</sup>

### SUPPORTING INFORMATION

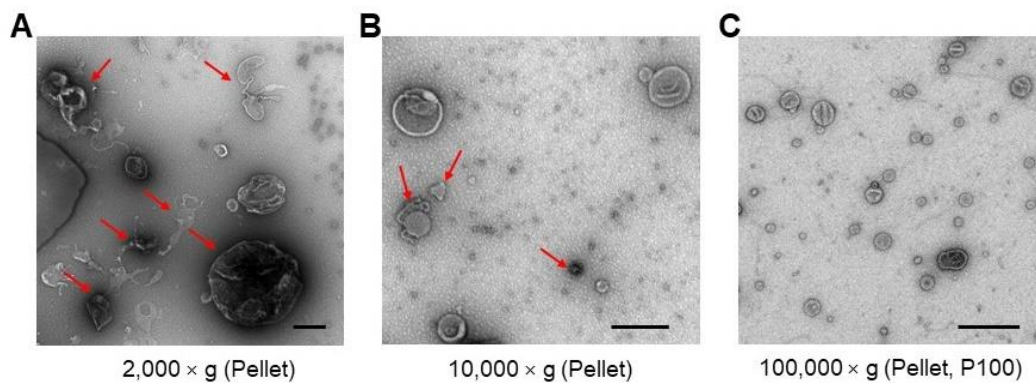

14  
15  
16  
17  
18  
19  
20  
21  
22  
23

**Figure S1. Representative transmission electron microscopy (TEM) images of fractions isolated by differential centrifugation of AWF from *Arabidopsis***

(A) Pellet of AWF centrifugation at 2,000 x g. Non-vesicle structures or cell debris marked by arrows. (B) Pellet of AWF centrifugation at 10,000 x g. (C) Pellet of AWF centrifugation at 100,000 x g (P100). Scale bars in (A–C), 500 nm.

24  
25  
26  
27  
28  
29

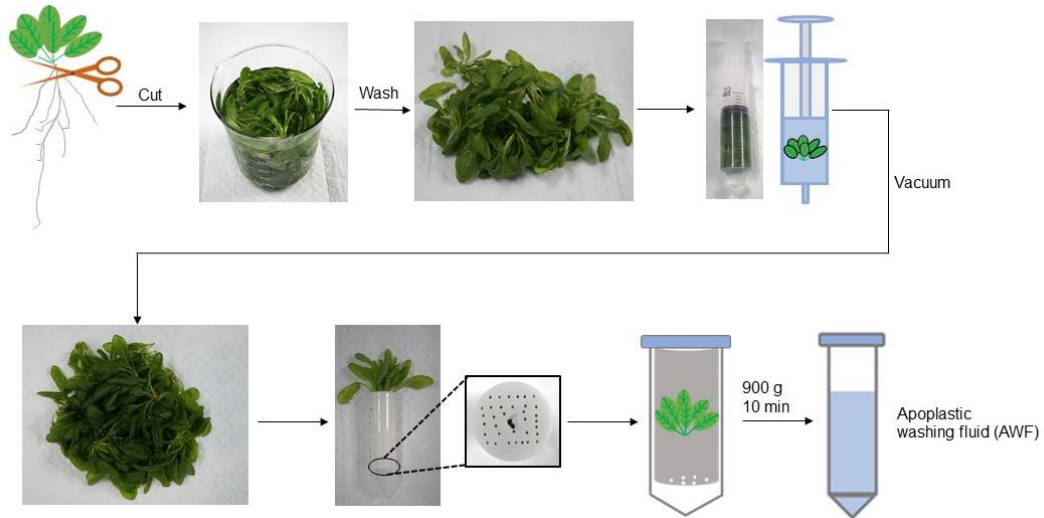

30  
31  
32  
33  
34  
35  
36  
37  
38

**Figure S2. Work-flow of isolation of AWF from *Arabidopsis* (Whole rosettes protocol, Method 2 in Figure 2)**

Whole rosettes were harvested at root by using scissors. The rosettes were placed in a syringe and gently vacuumed with infiltration buffer, and then placed root down into a 30 ml tube, which was then put into 50 ml conical tube, and then centrifuged at  $900 \times g$  to collect the AWF.
